# Supplementary material for: Nuclear RNA surveillance complexes silence HIV-1 transcription
Source: PubMed Central journal article supplement (PMC5875879; doi:10.1371/journal.ppat.1006950), 2018-03-19
Supplement: ppat.1006950.s001.pdf [file ppat.1006950.s001.pdf]

**S1 Table.** List of interactants of Flag-HA RRP6 or Flag-HA-MTR4 identified by mass spectrometry. Names of proteins shown in highlight are those also identified by Lubas et al. 2011

| RRP6         |                    |           | MTR4        |             |           |
|--------------|--------------------|-----------|-------------|-------------|-----------|
| reference    | Gene Symbol        | UniProtID | reference   | Gene Symbol | UniProtID |
| ELYS_HUMAN   | AHCTF1             | Q8WYP5    | AKAP8_HUMAN | AKAP8       | O43823    |
| AKAP8_HUMAN  | AKAP8              | O43823    | AKP8L_HUMAN | AKAP8L      | Q9ULX6    |
| AKP8L_HUMAN  | AKAP8L             | Q9ULX6    | AL3A1_HUMAN | ALDH3A1     | P30838    |
| ALDOA_HUMAN  | ALDOA              | P04075    | AL3A2_HUMAN | ALDH3A2     | P51648    |
| ANXA2_HUMAN  | ANXA2              | P07355    | ALDOA_HUMAN | ALDOA       | P04075    |
| BAG2_HUMAN   | BAG2               | O95816    | ALDOC_HUMAN | ALDOC       | P09972    |
| C1D_HUMAN    | C1D                | Q13901    | ANXA2_HUMAN | ANXA2       | P07355    |
| PYR1_HUMAN   | CAD                | P27708    | AXA2L_HUMAN | ANXA2P2     | A6NMY6    |
| CART_HUMAN   | CARTPT             | Q16568    | DX39B_HUMAN | BAT1        | Q13838    |
| TCPB_HUMAN   | CCT2               | P78371    | C1D_HUMAN   | C1D         | Q13901    |
| TCPG_HUMAN   | CCT3               | P49368    | CALL3_HUMAN | CALML3      | P27482    |
| TCPD_HUMAN   | CCT4               | P50991    | CALL5_HUMAN | CALML5      | Q9NZT1    |
| TCPH_HUMAN   | CCT7               | Q99832    | CALX_HUMAN  | CANX        | P27824    |
| TCPQ_HUMAN   | CCT8               | P50990    | CASPE_HUMAN | CASP14      | P31944    |
| CDK9_HUMAN   | CDK9               | P50750    | CCAR2_HUMAN | CCAR2       | Q8N163    |
| CE170_HUMAN  | CEP170             | Q5SW79    | CDC73_HUMAN | CDC73       | Q6P1J9    |
| CAF1B_HUMAN  | CHAF1B             | Q13112    | CATD_HUMAN  | CTSD        | P07339    |
| CHD9_HUMAN   | CHD9               | Q3L8U1    | DAXX_HUMAN  | DAXX        | Q9UER7    |
| DDX17_HUMAN  | DDX17              | Q92841    | DDX17_HUMAN | DDX17       | Q92841    |
| DD19A_HUMAN  | DDX19A             | Q9NUU7    | DD19B_HUMAN | DDX19B      | Q9UMR2    |
| DDX21_HUMAN  | DDX21              | Q9NR30    | DDX21_HUMAN | DDX21       | Q9NR30    |
| DDX31_HUMAN  | DDX31              | Q9H8H2    | DDX3X_HUMAN | DDX3X       | O00571    |
| DX39A_HUMAN  | DDX39A             | O00148    | DDX46_HUMAN | DDX46       | Q7L014    |
| DDX3X_HUMAN  | DDX3X              | O00571    | DDX47_HUMAN | DDX47       | Q9H0S4    |
| DDX41_HUMAN  | DDX41              | Q9UJV9    | DDX5_HUMAN  | DDX5        | P17844    |
| DDX5_HUMAN   | DDX5               | P17844    | DHX15_HUMAN | DHX15       | O43143    |
| DDX52_HUMAN  | DDX52              | Q9Y2R4    | DHX9_HUMAN  | DHX9        | Q08211    |
| DHX15_HUMAN  | DHX15              | O43143    | DYN2_HUMAN  | DNM2        | P50570    |
| Q7Z3W9_HUMAN | DKFZp686G18:Q7Z3W9 |           | EF1A1_HUMAN | EEF1A1      | P68104    |
| DNJA1_HUMAN  | DNAJA1             | P31689    | EF1A2_HUMAN | EEF1A2      | Q05639    |
| TDIF2_HUMAN  | DNTTIP2            | Q5QJE6    | EF2_HUMAN   | EEF2        | P13639    |
| DC1L1_HUMAN  | DYNC1LI1           | Q9Y6G9    | IF4A1_HUMAN | EIF4A1      | P60842    |
| EBP2_HUMAN   | EBNA1BP2           | Q99848    | IF4A3_HUMAN | EIF4A3      | P38919    |
| EF1A3_HUMAN  | EEF1A1P5           | Q5VTE0    | IF6_HUMAN   | EIF6        | P56537    |
| EF1A2_HUMAN  | EEF1A2             | Q05639    | ELAV1_HUMAN | ELAVL1      | Q15717    |
| IF4A3_HUMAN  | EIF4A3             | P38919    | ENOA_HUMAN  | ENO1        | P06733    |
| IF6_HUMAN    | EIF6               | P56537    | ENOG_HUMAN  | ENO2        | P09104    |
| ELAV1_HUMAN  | ELAVL1             | Q15717    | EX3L1_HUMAN | EXOC3L1     | Q86VI1    |
| EWS_HUMAN    | EWSR1              | Q01844    | EXOS1_HUMAN | EXOSC1      | Q9Y3B2    |
| EXOS1_HUMAN  | EXOSC1             | Q9Y3B2    | EXOSX_HUMAN | EXOSC10     | Q01780    |
| EXOSX_HUMAN  | EXOSC10            | Q01780    | EXOS2_HUMAN | EXOSC2      | Q13868    |
| EXOS2_HUMAN  | EXOSC2             | Q13868    | EXOS3_HUMAN | EXOSC3      | Q9NQT5    |
| EXOS3_HUMAN  | EXOSC3             | Q9NQT5    | EXOS4_HUMAN | EXOSC4      | Q9NPD3    |
| EXOS4_HUMAN  | EXOSC4             | Q9NPD3    | EXOS5_HUMAN | EXOSC5      | Q9NQT4    |
| EXOS5_HUMAN  | EXOSC5             | Q9NQT4    | EXOS6_HUMAN | EXOSC6      | Q5RKV6    |
| EXOS6_HUMAN  | EXOSC6             | Q5RKV6    | EXOS7_HUMAN | EXOSC7      | Q15024    |
| EXOS7_HUMAN  | EXOSC7             | Q15024    | EXOS8_HUMAN | EXOSC8      | Q96B26    |
| EXOS8_HUMAN  | EXOSC8             | Q96B26    | EXOS9_HUMAN | EXOSC9      | Q06265    |
| EXOS9_HUMAN  | EXOSC9             | Q06265    | FA98A_HUMAN | FAM98A      | Q8NCA5    |
| FAS_HUMAN    | FASN               | P49327    | FUS_HUMAN   | FUS         | P35637    |
| FIP1_HUMAN   | FIP1L1             | Q6UN15    | FXR1_HUMAN  | FXR1        | P51114    |

|             |           |        |             |           |        |
|-------------|-----------|--------|-------------|-----------|--------|
| FWCH1_HUMAN | FLYWCH1   | Q4VC44 | G3P_HUMAN   | GAPDH     | P04406 |
| FUBP3_HUMAN | FUBP3     | Q96I24 | GCN1_HUMAN  | GCN1      | Q92616 |
| FUS_HUMAN   | FUS       | P35637 | GBB2_HUMAN  | GNB2      | P62879 |
| GCN1_HUMAN  | GCN1      | Q92616 | GSTP1_HUMAN | GSTP1     | P09211 |
| GNL3L_HUMAN | GNL3L     | Q9NVN8 | NOG1_HUMAN  | GTPBP4    | Q9BZE4 |
| TF3C1_HUMAN | GTF3C1    | Q12789 | H2AV_HUMAN  | H2AFV     | Q71UI9 |
| TF3C4_HUMAN | GTF3C4    | Q9UKN8 | HEAT1_HUMAN | HEATR1    | Q9H583 |
| TF3C5_HUMAN | GTF3C5    | Q9Y5Q8 | H12_HUMAN   | HIST1H1C  | P16403 |
| NOG1_HUMAN  | GTPBP4    | Q9BZE4 | H2A1B_HUMAN | HIST1H2AB | P04908 |
| HDAC2_HUMAN | HDAC2     | Q92769 | H4_HUMAN    | HIST1H4A  | P62805 |
| HEAT1_HUMAN | HEATR1    | Q9H583 | H2B2E_HUMAN | HIST2H2BE | Q16778 |
| H11_HUMAN   | HIST1H1A  | Q02539 | HNRPC_HUMAN | HNRNPC    | P07910 |
| H12_HUMAN   | HIST1H1C  | P16403 | HNRC1_HUMAN | HNRNPCL1  | O60812 |
| H2A1A_HUMAN | HIST1H2AA | Q96QV6 | HNRPD_HUMAN | HNRNPD    | Q14103 |
| H4_HUMAN    | HIST1H4A  | P62805 | HNRPF_HUMAN | HNRNPF    | P52597 |
| ROA2_HUMAN  | HNRNPA2B1 | P22626 | HNRH1_HUMAN | HNRNPH1   | P31943 |
| HNRC1_HUMAN | HNRNPCL1  | O60812 | HNRH3_HUMAN | HNRNPH3   | P31942 |
| HNRPD_HUMAN | HNRNPD    | Q14103 | HNRPK_HUMAN | HNRNPK    | P61978 |
| HNRPF_HUMAN | HNRNPF    | P52597 | HNRPL_HUMAN | HNRNPL    | P14866 |
| HNRH1_HUMAN | HNRNPH1   | P31943 | HNRPM_HUMAN | HNRNPM    | P52272 |
| HNRPK_HUMAN | HNRNPK    | P61978 | HNRPU_HUMAN | HNRNPU    | Q00839 |
| HNRPL_HUMAN | HNRNPL    | P14866 | HNRL1_HUMAN | HNRNPUL1  | Q9BUJ2 |
| HNRPM_HUMAN | HNRNPM    | P52272 | HNRL2_HUMAN | HNRNPUL2  | Q1KMD3 |
| HPT_HUMAN   | HP        | P00738 | HS90A_HUMAN | HSP90AA1  | P07900 |
| HS90A_HUMAN | HSP90AA1  | P07900 | HS71A_HUMAN | HSPA1A    | P0DMV8 |
| HS90B_HUMAN | HSP90AB1  | P08238 | GRP78_HUMAN | HSPA5     | P11021 |
| ENPL_HUMAN  | HSP90B1   | P14625 | HSP77_HUMAN | HSPA7     | P48741 |
| HS71A_HUMAN | HSPA1A    | P0DMV8 | HSP7C_HUMAN | HSPA8     | P11142 |
| HS71L_HUMAN | HSPA1L    | P34931 | HSPB1_HUMAN | HSPB1     | P04792 |
| HSP72_HUMAN | HSPA2     | P54652 | IDE_HUMAN   | IDE       | P14735 |
| GRP78_HUMAN | HSPA5     | P11021 | ILF2_HUMAN  | ILF2      | Q12905 |
| HSP76_HUMAN | HSPA6     | P17066 | ILK_HUMAN   | ILK       | Q13418 |
| HSP7C_HUMAN | HSPA8     | P11142 | ILVBL_HUMAN | ILVBL     | A1L0T0 |
| GRP75_HUMAN | HSPA9     | P38646 | IQGA1_HUMAN | IQGAP1    | P46940 |
| HSPB1_HUMAN | HSPB1     | P04792 | KHDR1_HUMAN | KHDRBS1   | Q07666 |
| CH60_HUMAN  | HSPD1     | P10809 | LDHA_HUMAN  | LDHA      | P00338 |
| ILF2_HUMAN  | ILF2      | Q12905 | LDHB_HUMAN  | LDHB      | P07195 |
| IRX4_HUMAN  | IRX4      | P78413 | LEG7_HUMAN  | LGALS7    | P47929 |
| PLAK_HUMAN  | JUP       | P14923 | LMNA_HUMAN  | LMNA      | P02545 |
| KHDR1_HUMAN | KHDRBS1   | Q07666 | LMO7_HUMAN  | LMO7      | Q8WWI1 |
| LAS1L_HUMAN | LAS1L     | Q9Y4W2 | LYAR_HUMAN  | LYAR      | Q9NX58 |
| LBHD1_HUMAN | LBHD1     | Q9BQE6 | MATR3_HUMAN | MATR3     | P43243 |
| LMNA_HUMAN  | LMNA      | P02545 | MPH6_HUMAN  | MPHOSPH6  | Q99547 |
| LMNB1_HUMAN | LMNB1     | P20700 | MSH2_HUMAN  | MSH2      | P43246 |
| LRC40_HUMAN | LRRRC40   | Q9H9A6 | MSH6_HUMAN  | MSH6      | P52701 |
| LSG1_HUMAN  | LSG1      | Q9H089 | MYCBP_HUMAN | MYCBP     | Q99417 |
| MAGD1_HUMAN | MAGED1    | Q9Y5V3 | NCBP1_HUMAN | NCBP1     | Q09161 |
| MAGD2_HUMAN | MAGED2    | Q9UNF1 | NCBP2_HUMAN | NCBP2     | P52298 |
| MAP7_HUMAN  | MAP7      | Q14244 | NPM_HUMAN   | NPM1      | P06748 |
| JIP3_HUMAN  | MAPK8IP3  | Q9UPT6 | NRDE2_HUMAN | NRDE2     | Q9H7Z3 |
| MATR3_HUMAN | MATR3     | P43243 | NUMA1_HUMAN | NUMA1     | Q14980 |
| MCM7_HUMAN  | MCM7      | P33993 | PABP2_HUMAN | PABPN1    | Q86U42 |
| MGAP_HUMAN  | MGA       | Q8IW19 | PCBP1_HUMAN | PCBP1     | Q15365 |
| MISP_HUMAN  | MISP      | Q8IVT2 | PCBP2_HUMAN | PCBP2     | Q15366 |
| MPH6_HUMAN  | MPHOSPH6  | Q99547 | PDS5A_HUMAN | PDS5A     | Q29RF7 |
| MSH6_HUMAN  | MSH6      | P52701 | PEBP1_HUMAN | PEBP1     | P30086 |

|              |        |        |             |        |        |
|--------------|--------|--------|-------------|--------|--------|
| MYCBP_HUMAN  | MYCBP  | Q99417 | PELP1_HUMAN | PELP1  | Q8IZL8 |
| NACC1_HUMAN  | NACC1  | Q96RE7 | PFKAP_HUMAN | PFKP   | Q01813 |
| NACC2_HUMAN  | NACC2  | Q96BF6 | PGAM2_HUMAN | PGAM2  | P15259 |
| NP1L1_HUMAN  | NAP1L1 | P55209 | PKP1_HUMAN  | PKP1   | Q13835 |
| NCBP1_HUMAN  | NCBP1  | Q09161 | PPIA_HUMAN  | PPIA   | P62937 |
| NUCL_HUMAN   | NCL    | P19338 | PTBP1_HUMAN | PTBP1  | P26599 |
| NOL11_HUMAN  | NOL11  | Q9H8H0 | QSER1_HUMAN | QSER1  | Q2KHR3 |
| NOL9_HUMAN   | NOL9   | Q5SY16 | RB11B_HUMAN | RAB11B | Q15907 |
| NOP56_HUMAN  | NOP56  | O00567 | RAB1A_HUMAN | RAB1A  | P62820 |
| NOP58_HUMAN  | NOP58  | Q9Y2X3 | RAB7A_HUMAN | RAB7A  | P51149 |
| NPM_HUMAN    | NPM1   | P06748 | RACK1_HUMAN | RACK1  | P63244 |
| GCR_HUMAN    | NR3C1  | P04150 | RBM10_HUMAN | RBM10  | P98175 |
| NUMA1_HUMAN  | NUMA1  | Q14980 | RBM14_HUMAN | RBM14  | Q96PK6 |
| NVL_HUMAN    | NVL    | O15381 | RBM39_HUMAN | RBM39  | Q14498 |
| PABP2_HUMAN  | PABPN1 | Q86U42 | RBM4_HUMAN  | RBM4   | Q9BWF3 |
| PCBP2_HUMAN  | PCBP2  | Q15366 | RBM7_HUMAN  | RBM7   | Q9Y580 |
| PFKAL_HUMAN  | PFKL   | P17858 | RDH11_HUMAN | RDH11  | Q8TC12 |
| PFKAP_HUMAN  | PFKP   | Q01813 | RFC2_HUMAN  | RFC2   | P35250 |
| PPIA_HUMAN   | PPIA   | P62937 | RFC5_HUMAN  | RFC5   | P40937 |
| PRDX6_HUMAN  | PRDX6  | P30041 | RIF1_HUMAN  | RIF1   | Q5UIP0 |
| PRKDC_HUMAN  | PRKDC  | P78527 | RL11_HUMAN  | RPL11  | P62913 |
| ANM5_HUMAN   | PRMT5  | O14744 | RL12_HUMAN  | RPL12  | P30050 |
| PRP8_HUMAN   | PRPF8  | Q6P2Q9 | RL18_HUMAN  | RPL18  | Q07020 |
| PRS6B_HUMAN  | PSMC4  | P43686 | RL19_HUMAN  | RPL19  | P84098 |
| PSMD5_HUMAN  | PSMD5  | Q16401 | RL22_HUMAN  | RPL22  | P35268 |
| PTBP1_HUMAN  | PTBP1  | P26599 | RL24_HUMAN  | RPL24  | P83731 |
| PWP2_HUMAN   | PWP2   | Q15269 | RL27A_HUMAN | RPL27A | P46776 |
| QSER1_HUMAN  | QSER1  | Q2KHR3 | RL3_HUMAN   | RPL3   | P39023 |
| RASL1_HUMAN  | RASAL1 | O95294 | RL31_HUMAN  | RPL31  | P62899 |
| RBM14_HUMAN  | RBM14  | Q96PK6 | RL38_HUMAN  | RPL38  | P63173 |
| RBM39_HUMAN  | RBM39  | Q14498 | RL4_HUMAN   | RPL4   | P36578 |
| RBM7_HUMAN   | RBM7   | Q9Y580 | RL5_HUMAN   | RPL5   | P46777 |
| RFC2_HUMAN   | RFC2   | P35250 | RL7_HUMAN   | RPL7   | P18124 |
| RFC3_HUMAN   | RFC3   | P40938 | RL7A_HUMAN  | RPL7A  | P62424 |
| RFC4_HUMAN   | RFC4   | P35249 | RL8_HUMAN   | RPL8   | P62917 |
| RIF1_HUMAN   | RIF1   | Q5UIP0 | RL9_HUMAN   | RPL9   | P32969 |
| RNF12_HUMAN  | RLIM   | Q9NVW2 | RLA0_HUMAN  | RPLP0  | P05388 |
| RNF219_HUMAN | RNF219 | Q5W0B1 | RLA1_HUMAN  | RPLP1  | P05386 |
| RL11_HUMAN   | RPL11  | P62913 | RLA2_HUMAN  | RPLP2  | P05387 |
| RL12_HUMAN   | RPL12  | P30050 | RPN1_HUMAN  | RPN1   | P04843 |
| RL13_HUMAN   | RPL13  | P26373 | RS13_HUMAN  | RPS13  | P62277 |
| RL13A_HUMAN  | RPL13A | P40429 | RS14_HUMAN  | RPS14  | P62263 |
| RL14_HUMAN   | RPL14  | P50914 | RS15A_HUMAN | RPS15A | P62244 |
| RL18_HUMAN   | RPL18  | Q07020 | RS16_HUMAN  | RPS16  | P62249 |
| RL19_HUMAN   | RPL19  | P84098 | RS18_HUMAN  | RPS18  | P62269 |
| RL22_HUMAN   | RPL22  | P35268 | RS19_HUMAN  | RPS19  | P39019 |
| RL23_HUMAN   | RPL23  | P62829 | RS2_HUMAN   | RPS2   | P15880 |
| RL24_HUMAN   | RPL24  | P83731 | RS20_HUMAN  | RPS20  | P60866 |
| RL27A_HUMAN  | RPL27A | P46776 | RS3_HUMAN   | RPS3   | P23396 |
| RL3_HUMAN    | RPL3   | P39023 | RS3A_HUMAN  | RPS3A  | P61247 |
| RL30_HUMAN   | RPL30  | P62888 | RS4X_HUMAN  | RPS4X  | P62701 |
| RL31_HUMAN   | RPL31  | P62899 | RS6_HUMAN   | RPS6   | P62753 |
| RL34_HUMAN   | RPL34  | P49207 | RS7_HUMAN   | RPS7   | P62081 |
| RL35_HUMAN   | RPL35  | P42766 | RS8_HUMAN   | RPS8   | P62241 |
| RL38_HUMAN   | RPL38  | P63173 | RUVB1_HUMAN | RUVBL1 | Q9Y265 |
| RL4_HUMAN    | RPL4   | P36578 | RUVB2_HUMAN | RUVBL2 | Q9Y230 |

|             |          |        |                  |           |            |
|-------------|----------|--------|------------------|-----------|------------|
| RL6_HUMAN   | RPL6     | Q02878 | SPB13_HUMAN      | SERPINB13 | Q9UIV8     |
| RL7_HUMAN   | RPL7     | P18124 | SPB3_HUMAN       | SERPINB3  | P29508     |
| RL8_HUMAN   | RPL8     | P62917 | SPB4_HUMAN       | SERPINB4  | P48594     |
| RL9_HUMAN   | RPL9     | P32969 | SPB5_HUMAN       | SERPINB5  | P36952     |
| RLA0_HUMAN  | RPLP0    | P05388 | SF3B1_HUMAN      | SF3B1     | O75533     |
| RLA1_HUMAN  | RPLP1    | P05386 | SK2L2_HUMAN      | SKIV2L2   | P42285     |
| RLA2_HUMAN  | RPLP2    | P05387 | 4F2_HUMAN        | SLC3A2    | P08195     |
| RS13_HUMAN  | RPS13    | P62277 | LAT1_HUMAN       | SLC7A5    | Q01650     |
| RS14_HUMAN  | RPS14    | P62263 | SMC4_HUMAN       | SMC4      | Q9NTJ3     |
| RS15A_HUMAN | RPS15A   | P62244 | U520_HUMAN       | SNRNP200  | O75643     |
| RS16_HUMAN  | RPS16    | P62249 | SPTB2_HUMAN      | SPTBN1    | Q01082     |
| RS182_HUMAN | RPS18    | P62269 | SRRT_HUMAN       | SRRT      | Q9BXP5     |
| RS19_HUMAN  | RPS19    | P39019 | SSRA_HUMAN       | SSR1      | P43307     |
| RS2_HUMAN   | RPS2     | P15880 | SSRG_HUMAN       | SSR3      | Q9UNL2     |
| RS21_HUMAN  | RPS21    | P63220 | STK38_HUMAN      | STK38     | Q15208     |
| RS23_HUMAN  | RPS23    | P62266 | SUGP2_HUMAN      | SUGP2     | Q8IX01     |
| RS24_HUMAN  | RPS24    | P62847 | SYMPK_HUMAN      | SYMPK     | Q92797     |
| RS25_HUMAN  | RPS25    | P62851 | TAF12_HUMAN      | TAF12     | Q16514     |
| RS26_HUMAN  | RPS26    | P62854 | TADBP_HUMAN      | TARDBP    | Q13148     |
| RS28_HUMAN  | RPS28    | P62857 | TFR1_HUMAN       | TFRC      | P02786     |
| RS30_HUMAN  | RPS30    | P62861 | A0A024RBE7_HUMAN | TMPO      | A0A024RBE7 |
| RS7_HUMAN   | RPS7     | P62081 | TPIS_HUMAN       | TPI1      | P60174     |
| RS8_HUMAN   | RPS8     | P62241 | TREX2_HUMAN      | TREX2     | Q9BQ50     |
| RS9_HUMAN   | RPS9     | P46781 | THIO_HUMAN       | TXN       | P10599     |
| RSSA_HUMAN  | RPSA     | P08865 | UBR5_HUMAN       | UBR5      | O95071     |
| RUVB1_HUMAN | RUVBL1   | Q9Y265 | URB2_HUMAN       | URB2      | Q14146     |
| RUVB2_HUMAN | RUVBL2   | Q9Y230 | VIME_HUMAN       | VIM       | P08670     |
| SHC1_HUMAN  | SHC1     | P29353 | VSIG8_HUMAN      | VSIG8     | Q5VU13     |
| SK2L2_HUMAN | SKIV2L2  | P42285 | XPO1_HUMAN       | XPO1      | O14980     |
| U520_HUMAN  | SNRNP200 | O75643 | XRN2_HUMAN       | XRN2      | Q9H0D6     |
| SMD2_HUMAN  | SNRPD2   | P62316 | YBOX1_HUMAN      | YBX1      | P67809     |
| SMD3_HUMAN  | SNRPD3   | P62318 | YBOX3_HUMAN      | YBX3      | P16989     |
| SPA5L_HUMAN | SPATA5L1 | Q9BVQ7 | 1433E_HUMAN      | YWHAE     | P62258     |
| SPTB2_HUMAN | SPTBN1   | Q01082 | 1433G_HUMAN      | YWHAG     | P61981     |
| SYNEM_HUMAN | SYNM     | O15061 | ZC3HE_HUMAN      | ZC3H14    | Q6PJT7     |
| RBP56_HUMAN | TAF15    | Q92804 | ZCH18_HUMAN      | ZC3H18    | Q86VM9     |
| TBL3_HUMAN  | TBL3     | Q12788 | ZCHC8_HUMAN      | ZCCHC8    | Q6NZY4     |
| HTF4_HUMAN  | TCF12    | Q99081 | ZC3H1_HUMAN      | ZFC3H1    | O60293     |
| TCPA_HUMAN  | TCP1     | P17987 | ZN326_HUMAN      | ZNF326    | Q5BKZ1     |
| LAP2A_HUMAN | TMPO     | P42166 |                  |           |            |
| TOP2A_HUMAN | TOP2A    | P11388 |                  |           |            |
| TRI29_HUMAN | TRIM29   | Q14134 |                  |           |            |
| PCH2_HUMAN  | TRIP13   | Q15645 |                  |           |            |
| SEN54_HUMAN | TSEN54   | Q7Z6J9 |                  |           |            |
| THIO_HUMAN  | TXN      | P10599 |                  |           |            |
| UBR5_HUMAN  | UBR5     | O95071 |                  |           |            |
| UBP11_HUMAN | USP11    | P51784 |                  |           |            |
| UTP18_HUMAN | UTP18    | Q9Y5J1 |                  |           |            |
| UTP20_HUMAN | UTP20    | O75691 |                  |           |            |
| VIME_HUMAN  | VIM      | P08670 |                  |           |            |
| WDR18_HUMAN | WDR18    | Q9BV38 |                  |           |            |
| WDR3_HUMAN  | WDR3     | Q9UNX4 |                  |           |            |
| WDR36_HUMAN | WDR36    | Q8NI36 |                  |           |            |
| WDR75_HUMAN | WDR75    | Q8IWA0 |                  |           |            |
| MEP50_HUMAN | WDR77    | Q9BQA1 |                  |           |            |
| WRIP1_HUMAN | WRNIP1   | Q96S55 |                  |           |            |

|              |        |        |
|--------------|--------|--------|
| XRCC5_HUMAN  | XRCC5  | P13010 |
| XRCC6_HUMAN  | XRCC6  | P12956 |
| 1433B_HUMAN  | YWHAB  | P31946 |
| 1433E_HUMAN  | YWHAE  | P62258 |
| 1433G_HUMAN  | YWHAG  | P61981 |
| ZBT20_HUMAN  | ZBTB20 | Q9HC78 |
| ZBT24_HUMAN  | ZBTB24 | O43167 |
| ZCH18_HUMAN  | ZC3H18 | Q86VM9 |
| ZCHC8_HUMAN  | ZCCHC8 | Q6NZY4 |
| ZC3H1_HUMAN  | ZFC3H1 | O60293 |
| ZN106_HUMAN  | ZNF106 | Q9H2Y7 |
| ZN281_HUMAN  | ZNF281 | Q9Y2X9 |
| ZN326_HUMAN  | ZNF326 | Q5BKZ1 |
| ZN644_HUMAN  | ZNF644 | Q9H582 |
| Q59F66_HUMAN |        | Q59F66 |
| Q9P1K8_HUMAN |        | Q9P1K8 |
